# Supplementary material for: Comprehensive Global Assessment of 23 Gridded Precipitation Datasets Across 16,295 Catchments Using Hydrological Modeling
Source: Copernicus journal article supplement (doi:10.5194/egusphere-2024-4194), 2025-01-20
Supplement: Supplementary file 1 [file egusphere-2024-4194-supplement.pdf]

Comprehensive Global Assessment of 23 Gridded  
Precipitation Datasets Across 16,295 Catchments  
Using Hydrological Modeling

Abbas et al., 2025

December 30, 2024

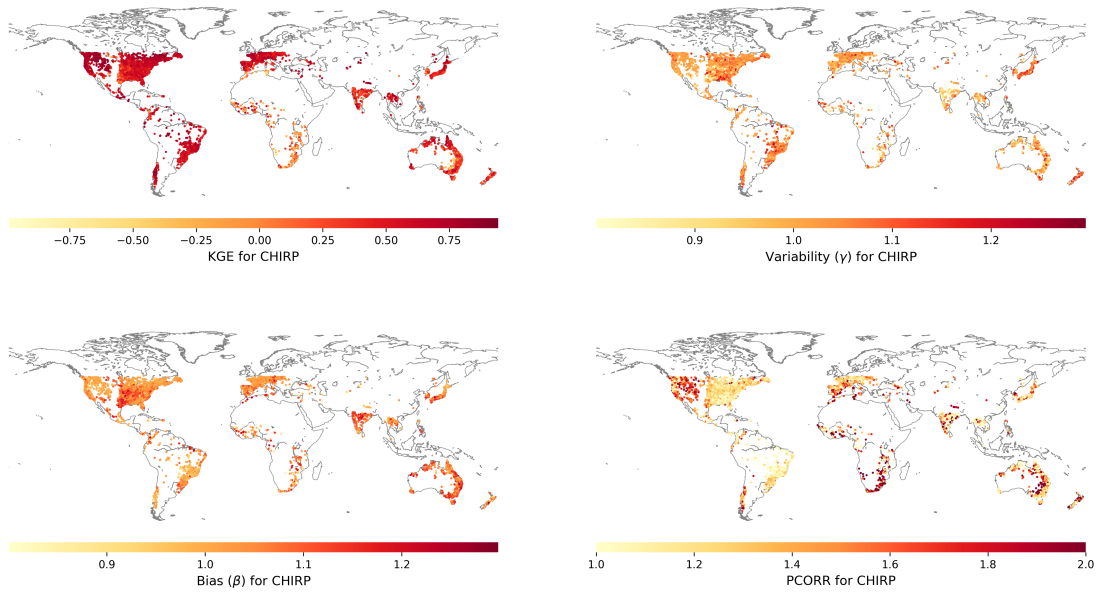

Figure S1: Calibration performance (KGE, Variability and Bias) and PCORR values achieved for CHIRP dataset.

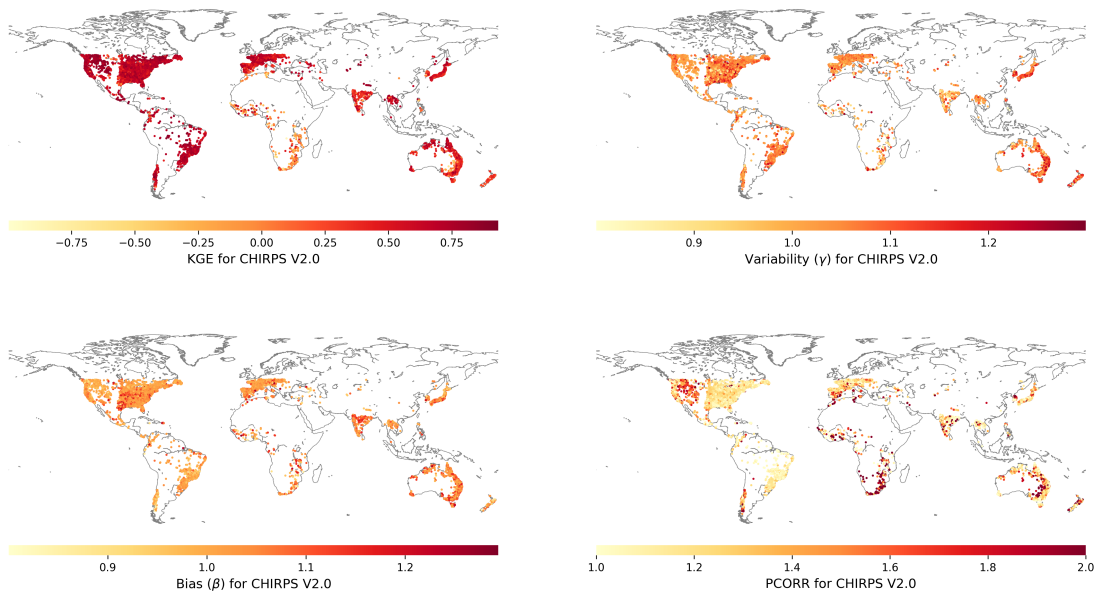

Figure S2: Calibration performance (KGE, Variability and Bias) and PCORR values achieved CHIRPS V2.0 dataset.

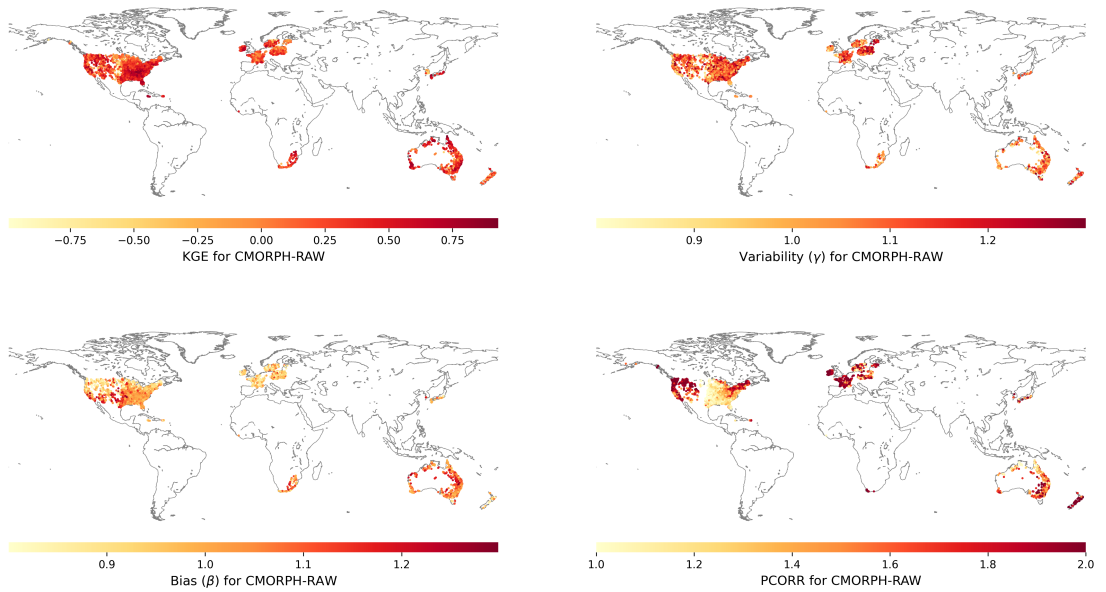

Figure S3: Calibration performance (KGE, Variability and Bias) and PCORR values achieved for CMORPH-RAW dataset.

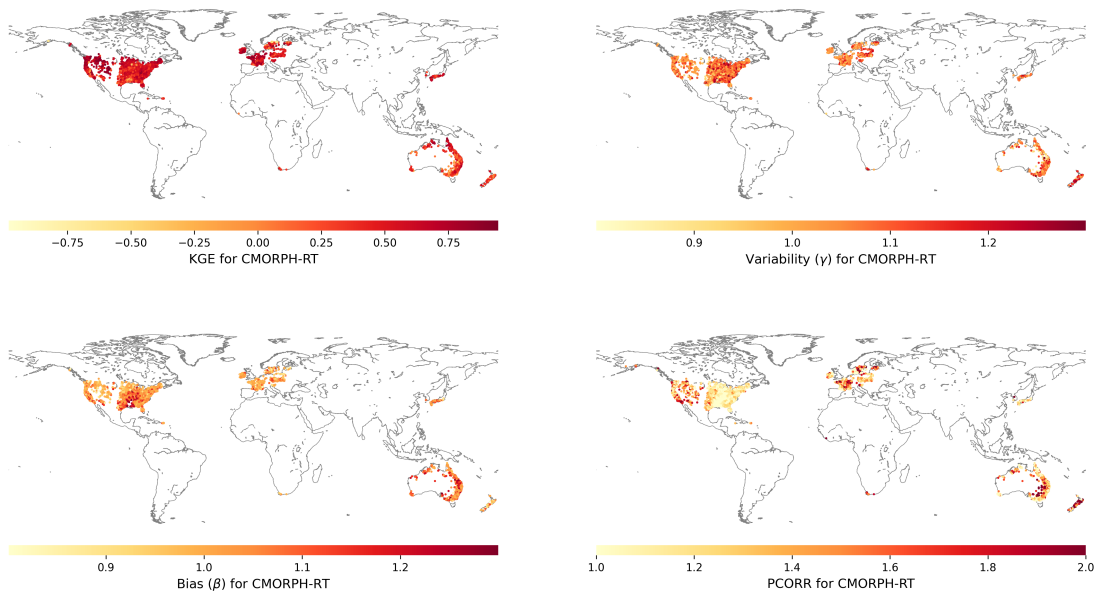

Figure S4: Calibration performance (KGE, Variability and Bias) and PCORR values achieved for CMORPH-RT dataset.

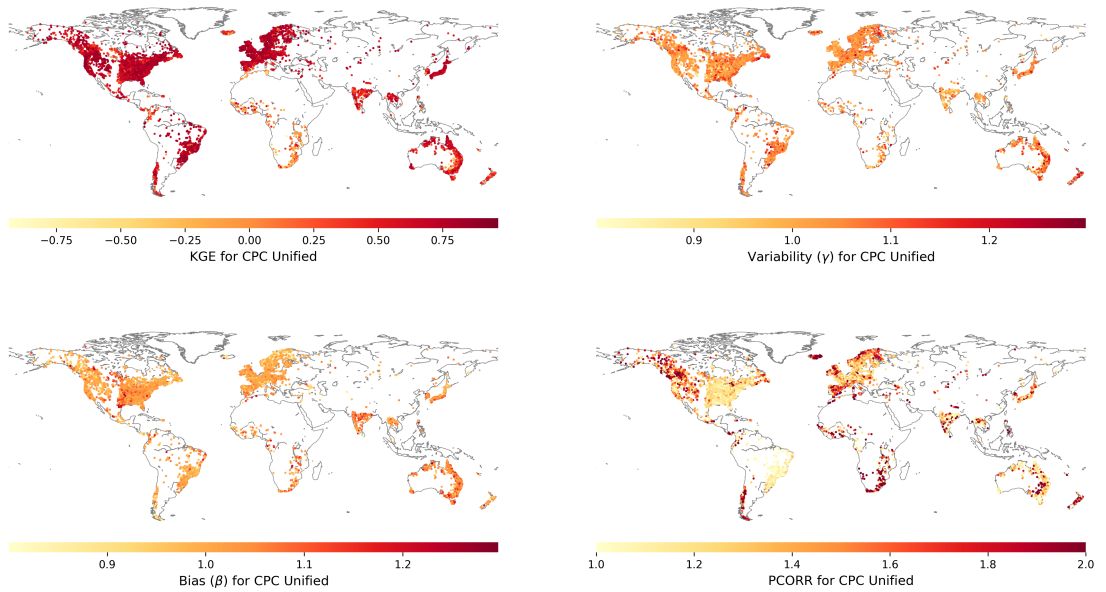

Figure S5: Calibration performance (KGE, Variability and Bias) and PCORR values achieved CPC Unified dataset.

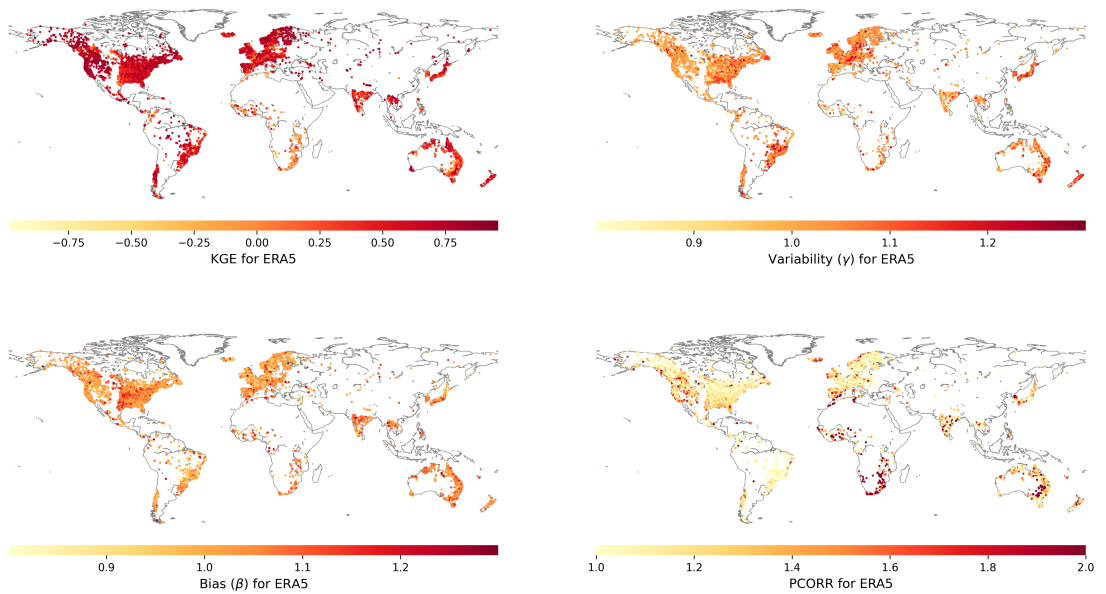

Figure S6: Calibration performance (KGE, Variability and Bias) and PCORR values achieved for ERA5 dataset.



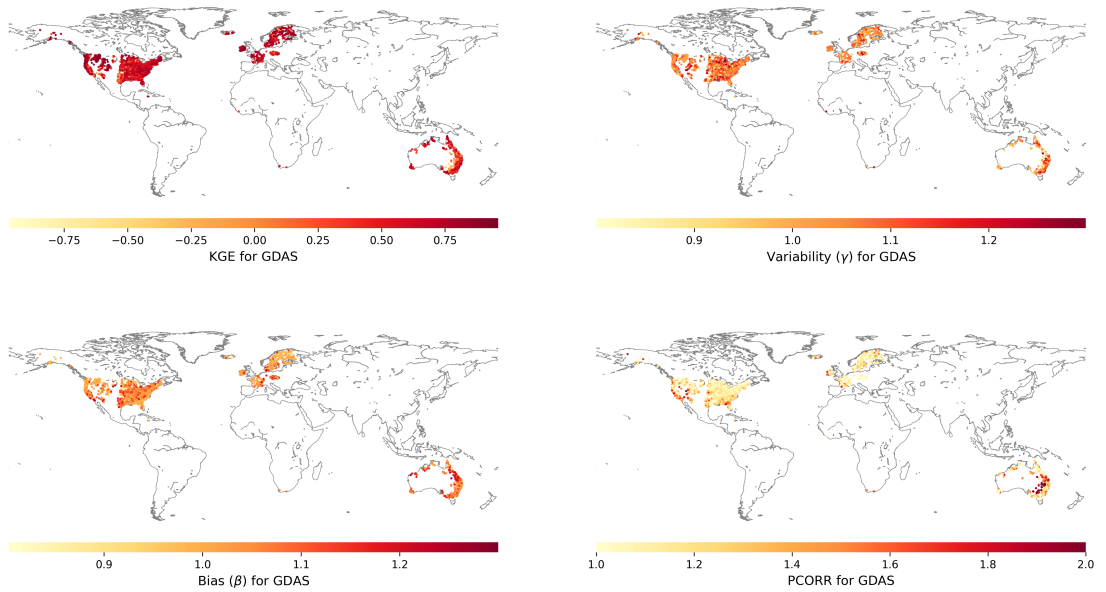

Figure S7: Calibration performance (KGE, Variability and Bias) and PCORR values achieved for GDAS dataset.

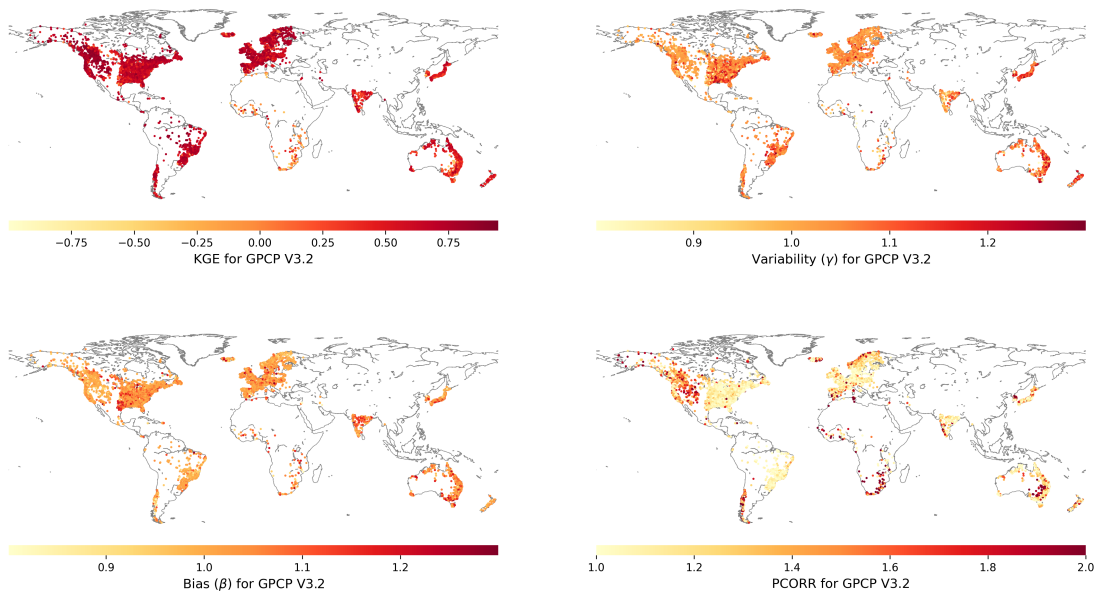

Figure S8: Calibration performance (KGE, Variability and Bias) and PCORR values achieved for GPCP V3.2 dataset.

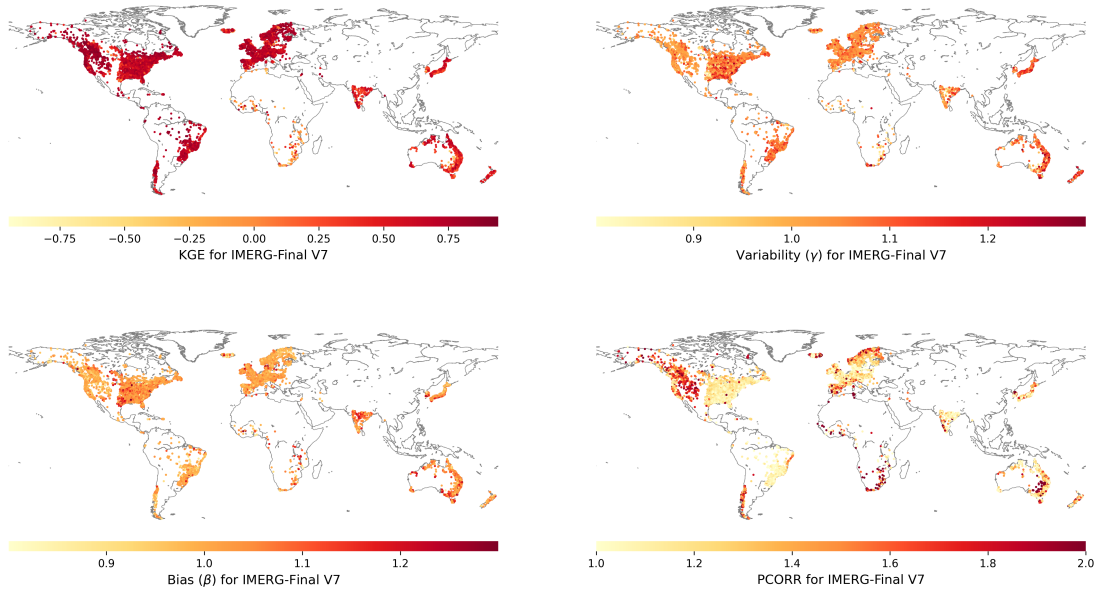

Figure S9: Calibration performance (KGE, Variability and Bias) and PCORR values achieved IMERG-Final V7 dataset.

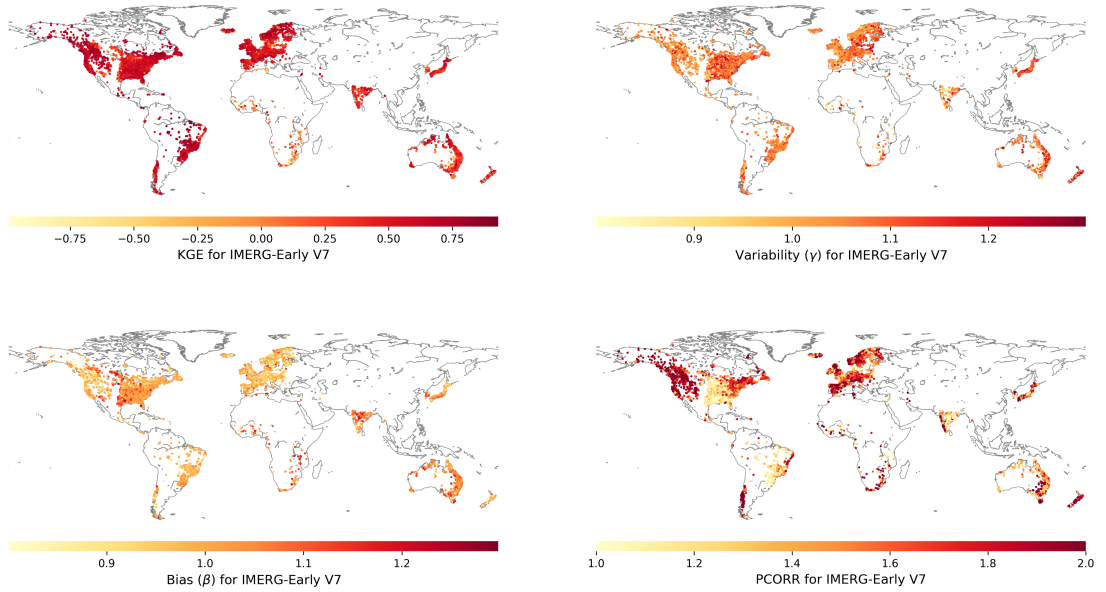

Figure S10: Calibration performance (KGE, Variability and Bias) and PCORR values achieved for IMERG-Early V7 dataset.

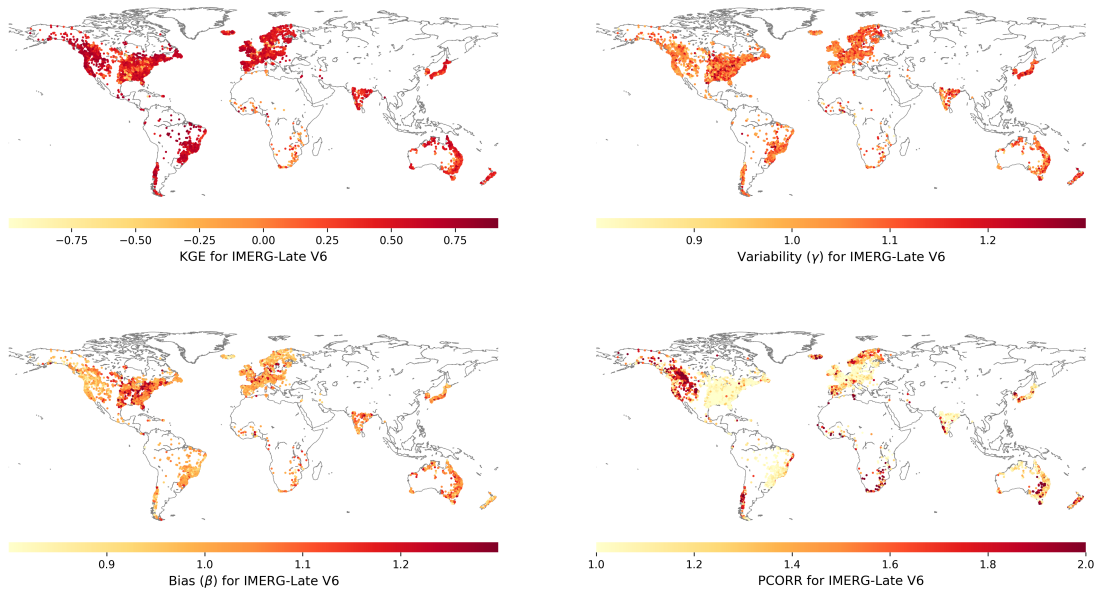

Figure S11: Calibration performance (KGE, Variability and Bias) and PCORR values achieved for IMERG-Late V6 dataset.

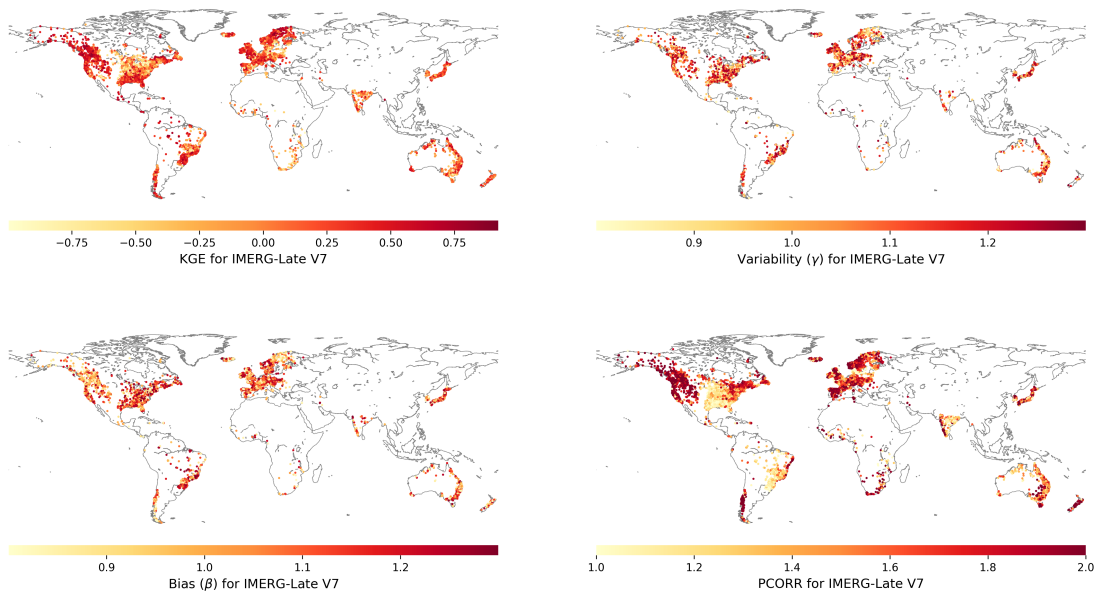

Figure S12: Calibration performance (KGE, Variability and Bias) and PCORR values achieved for IMERG-Late V7 dataset.

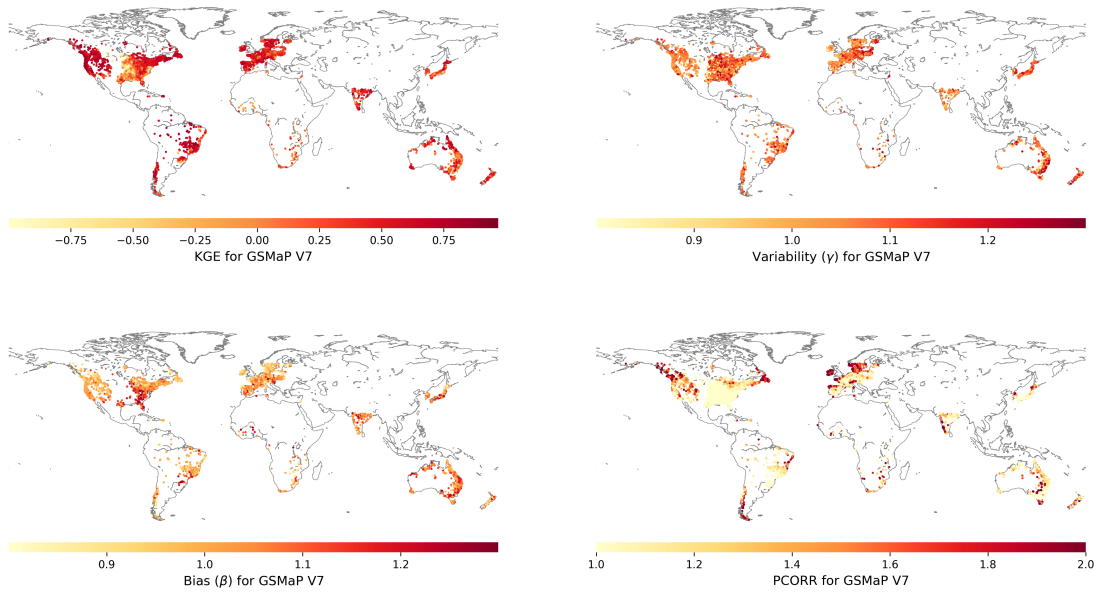

Figure S13: Calibration performance (KGE, Variability and Bias) and PCORR values achieved for GSMaP V7 dataset.

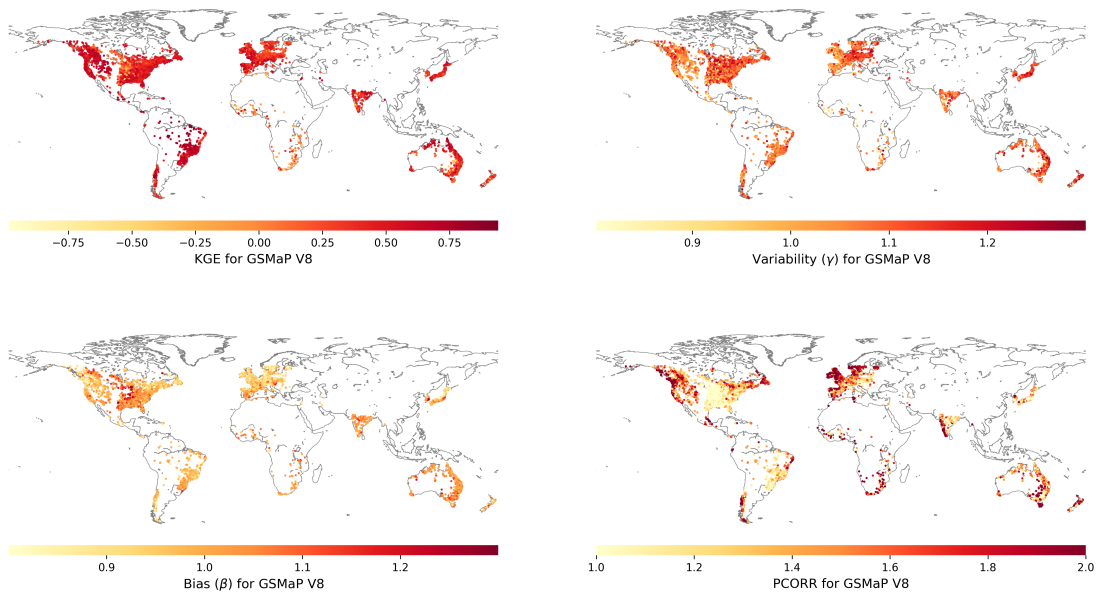

Figure S14: Calibration performance (KGE, Variability and Bias) and PCORR values achieved for GSMaP V8 dataset.

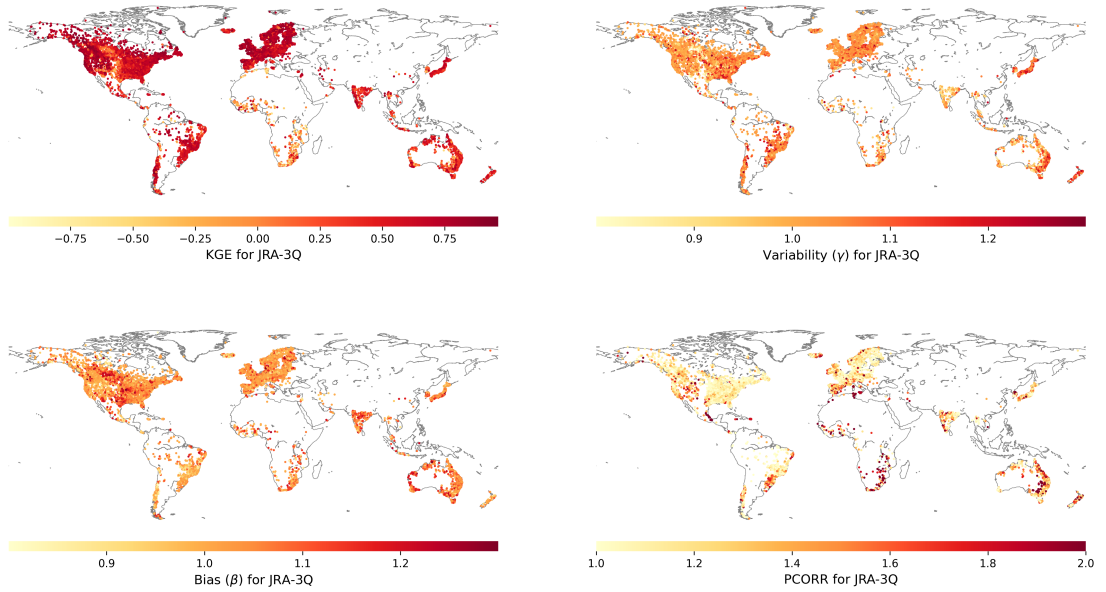

Figure S15: Calibration performance (KGE, Variability and Bias) and PCORR values achieved for JRA-3Q dataset.

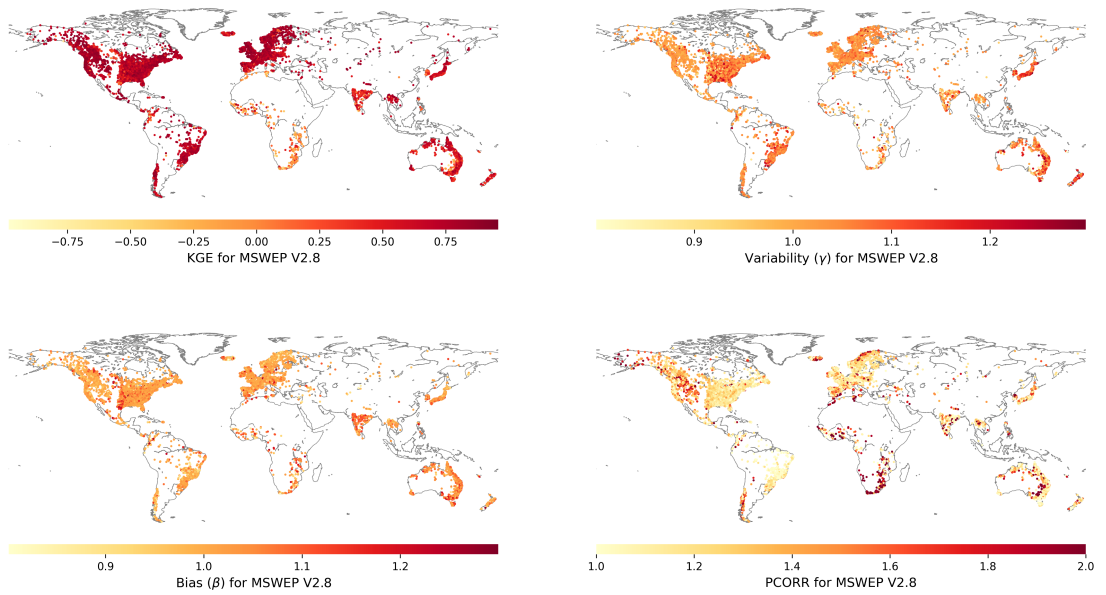

Figure S16: Calibration performance (KGE, Variability and Bias) and PCORR values achieved for MSWEP V2.8 dataset.

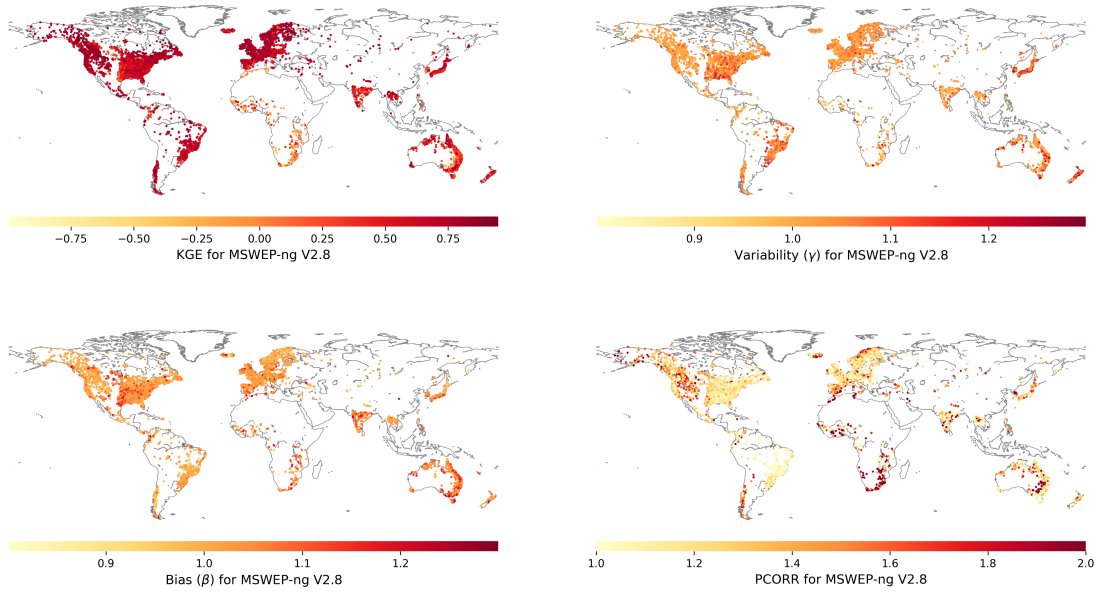

Figure S17: Calibration performance (KGE, Variability and Bias) and PCORR values achieved for MSWEP-ng V2.8 dataset.

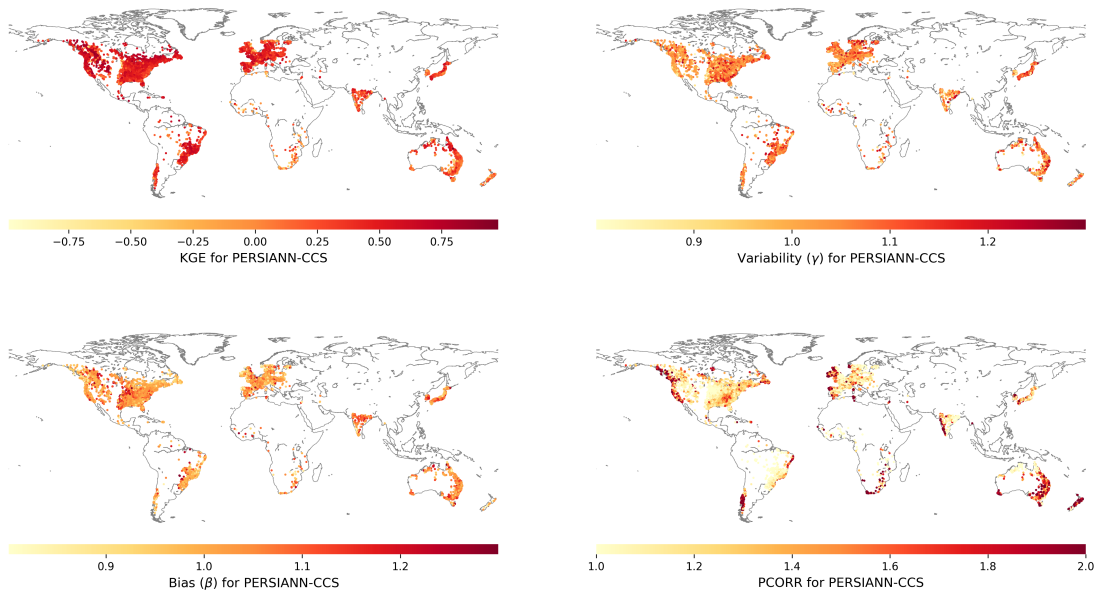

Figure S18: Calibration performance (KGE, Variability and Bias) and PCORR values achieved for PERSIANN-CCS dataset.

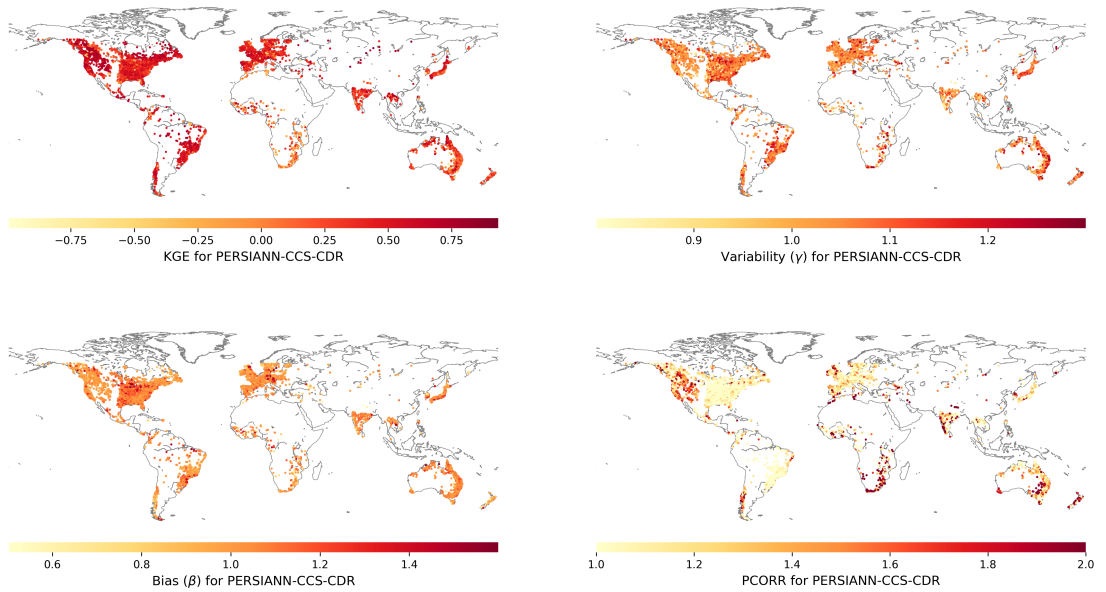

Figure S19: Calibration performance (KGE, Variability and Bias) and PCORR values achieved for PERSIANN-CCS-CDR dataset.

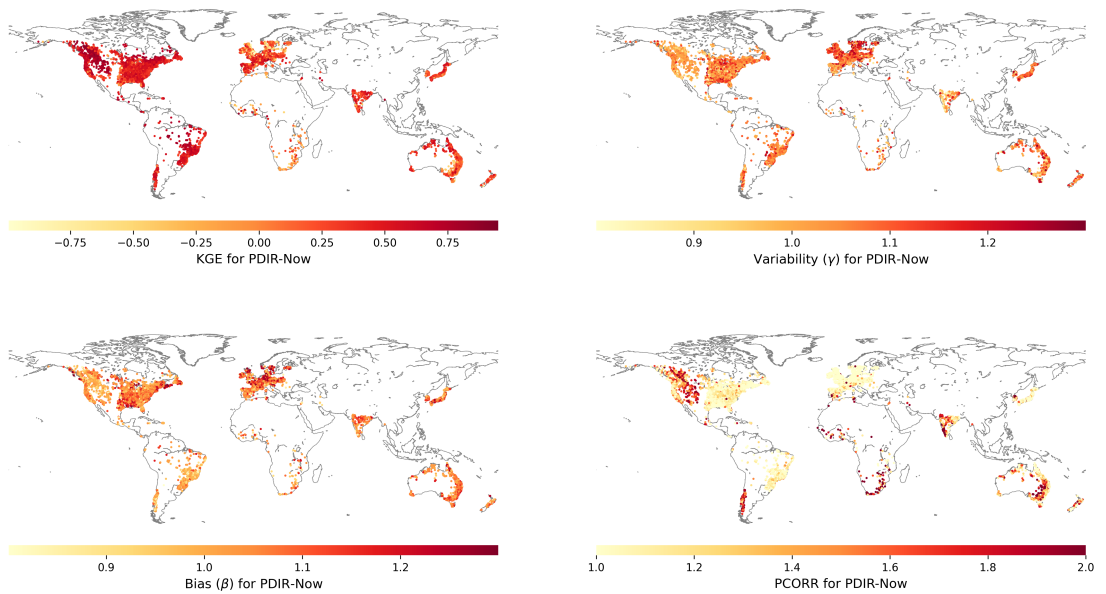

Figure S20: Calibration performance (KGE, Variability and Bias) and PCORR values achieved for PDIR-Now dataset.



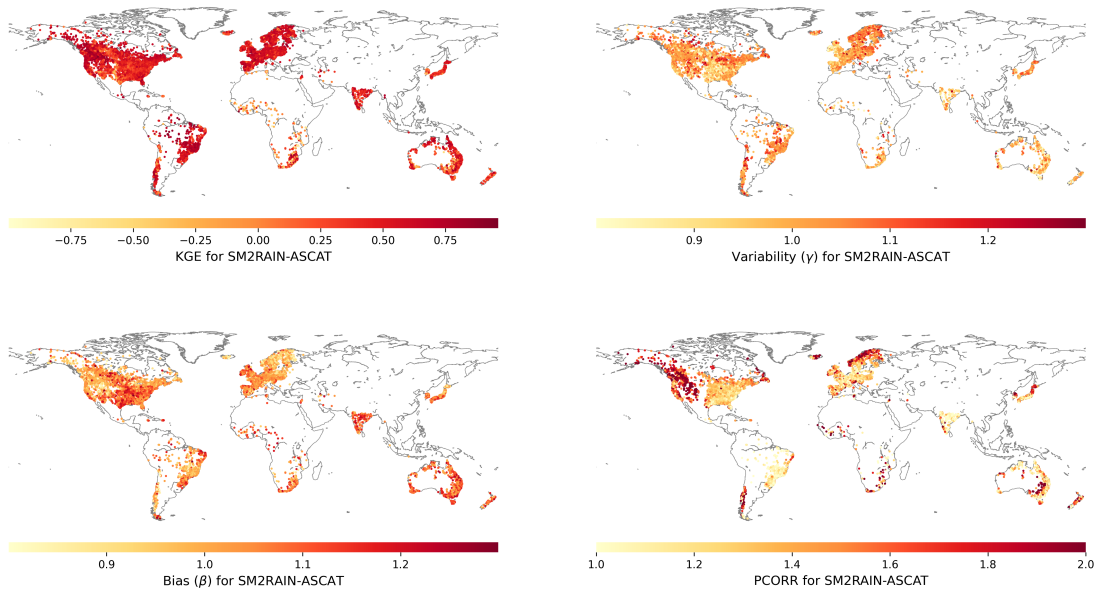

Figure S21: Calibration performance (KGE, Variability and Bias) and PCORR values achieved for SM2RAIN-ASCAT dataset.

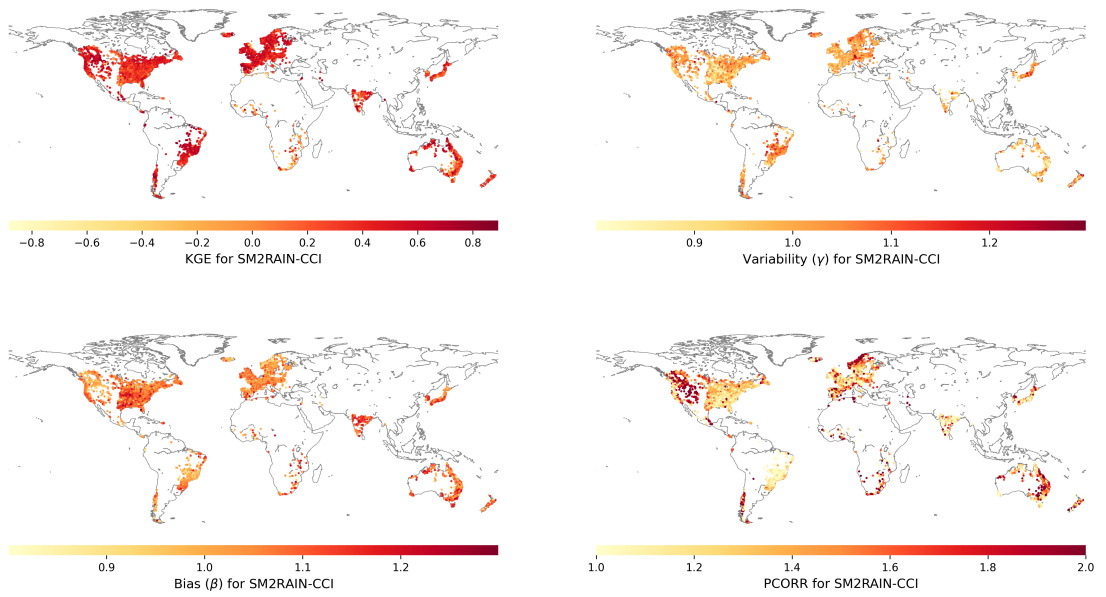

Figure S22: Calibration performance (KGE, Variability and Bias) and PCORR values achieved for SM2RAIN-CCI dataset.



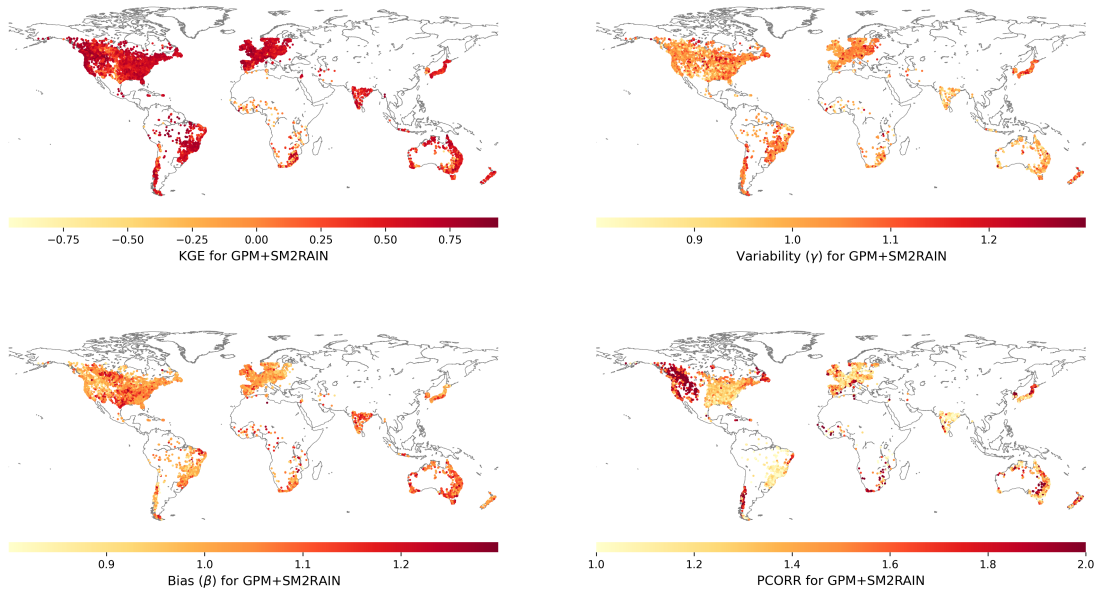

Figure S23: Calibration performance (KGE, Variability and Bias) and PCORR values achieved for GPM+SM2RAIN dataset.

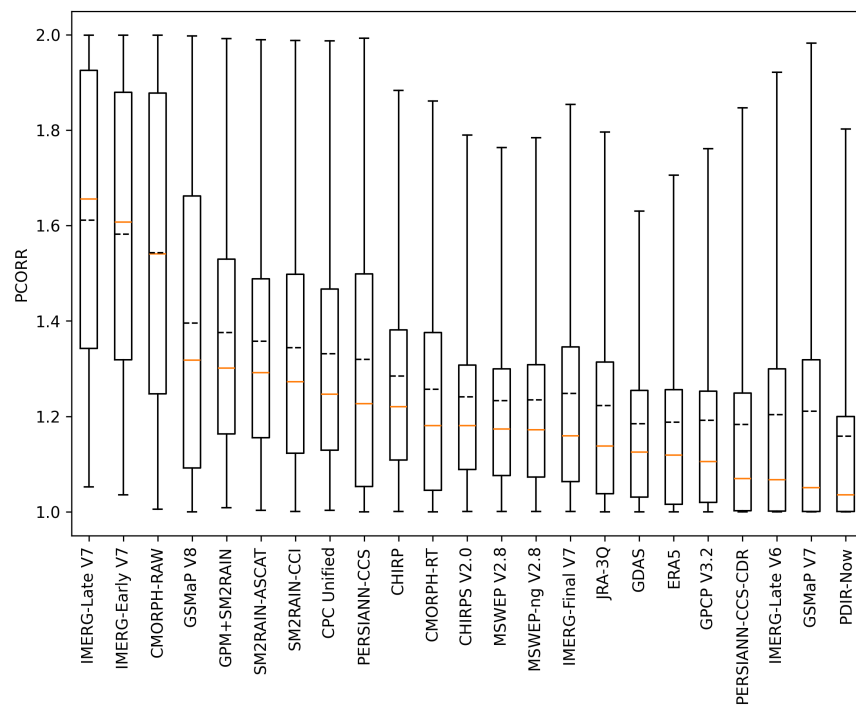

Figure S24: Distribution of PCORR values achieved after calibration for different  $P$  products.

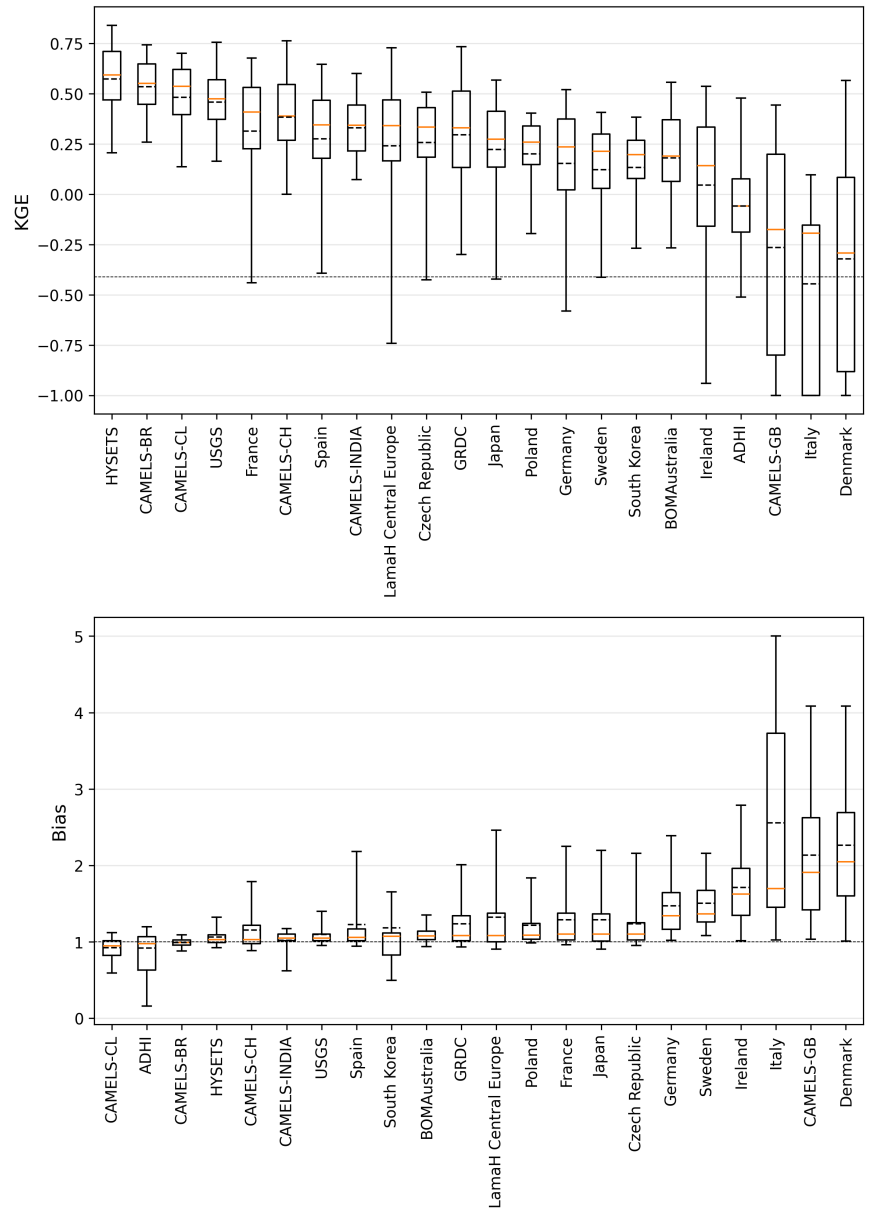

Figure S25: Distribution of calibration KGE and Bias for different streamflow data sources for PDIR-Now.
